# Supplementary material for: Functionally-selective inhibition of threshold sodium currents and excitability in dorsal root ganglion neurons by cannabinol
Source: Springer Nature journal article supplement (doi:10.1038/s42003-024-05781-x), 2024-01-23
Supplement: MOESM1 [file 42003_2024_5781_MOESM1_ESM-1.pdf]

**Table S1.  $V_{1/2}$  (mV) for Activation, SSI 500 ms, SSI 200 ms, SI 1 s, SI 3 s, SI 5 s, and SI 10 s. These numbers are related to Figures 2, 3, and 4  $\pm$  SEM. \* indicates statistical significance.**

| <b>Concentration</b>        | <b>Activation</b> | <b>SSI 500 ms</b> | <b>SSI 200 ms</b> | <b>SI 1 s</b>   | <b>SI 3 s</b>    | <b>SI 5 s</b>    | <b>SI 10 s</b>   |
|-----------------------------|-------------------|-------------------|-------------------|-----------------|------------------|------------------|------------------|
| <b>Veh</b>                  | -45.0 $\pm$ 1.6   | -84.6 $\pm$ 1.4   | -79.9 $\pm$ 0.3   | -41.2 $\pm$ 6.4 | -34.8 $\pm$ 2.0  | -36.9 $\pm$ 1.6  | -44.7 $\pm$ 1.6  |
| <b>1 <math>\mu</math>M</b>  | -41.9 $\pm$ 1.3   | -84.0 $\pm$ 1.5   | -80.1 $\pm$ 0.4   | -42.1 $\pm$ 3.8 | -33.6 $\pm$ 2.0  | -36.1 $\pm$ 1.1  | -45.0 $\pm$ 0.9  |
| <b>4 <math>\mu</math>M</b>  | -44.7 $\pm$ 1.8   | -86.1 $\pm$ 1.9   | -81.0 $\pm$ 0.5   | -36.2 $\pm$ 4.5 | -34.4 $\pm$ 2.6  | -34.8 $\pm$ 1.8  | -44.5 $\pm$ 1.3  |
| <b>7 <math>\mu</math>M</b>  | -44.0 $\pm$ 1.3   | -89.0 $\pm$ 3.6   | -80.0 $\pm$ 0.2   | -40.9 $\pm$ 4.4 | -38.9 $\pm$ 2.2  | -40.1 $\pm$ 1.4  | -46.5 $\pm$ 1.0  |
| <b>15 <math>\mu</math>M</b> | -39.6 $\pm$ 1.1   | -99.3 $\pm$ 1.3*  | -85.6 $\pm$ 0.4*  | -42.0 $\pm$ 3.8 | -39.2 $\pm$ 2.0* | -45.4 $\pm$ 1.1* | -56.7 $\pm$ 1.0* |
| <b>30 <math>\mu</math>M</b> | -48.4 $\pm$ 6.5   | -100.6 $\pm$ 2.7* | -88.1 $\pm$ 0.3*  | -35.8 $\pm$ 3.2 | -44.2 $\pm$ 1.4* | -52.4 $\pm$ 1.0* | -64.4 $\pm$ 1.4* |

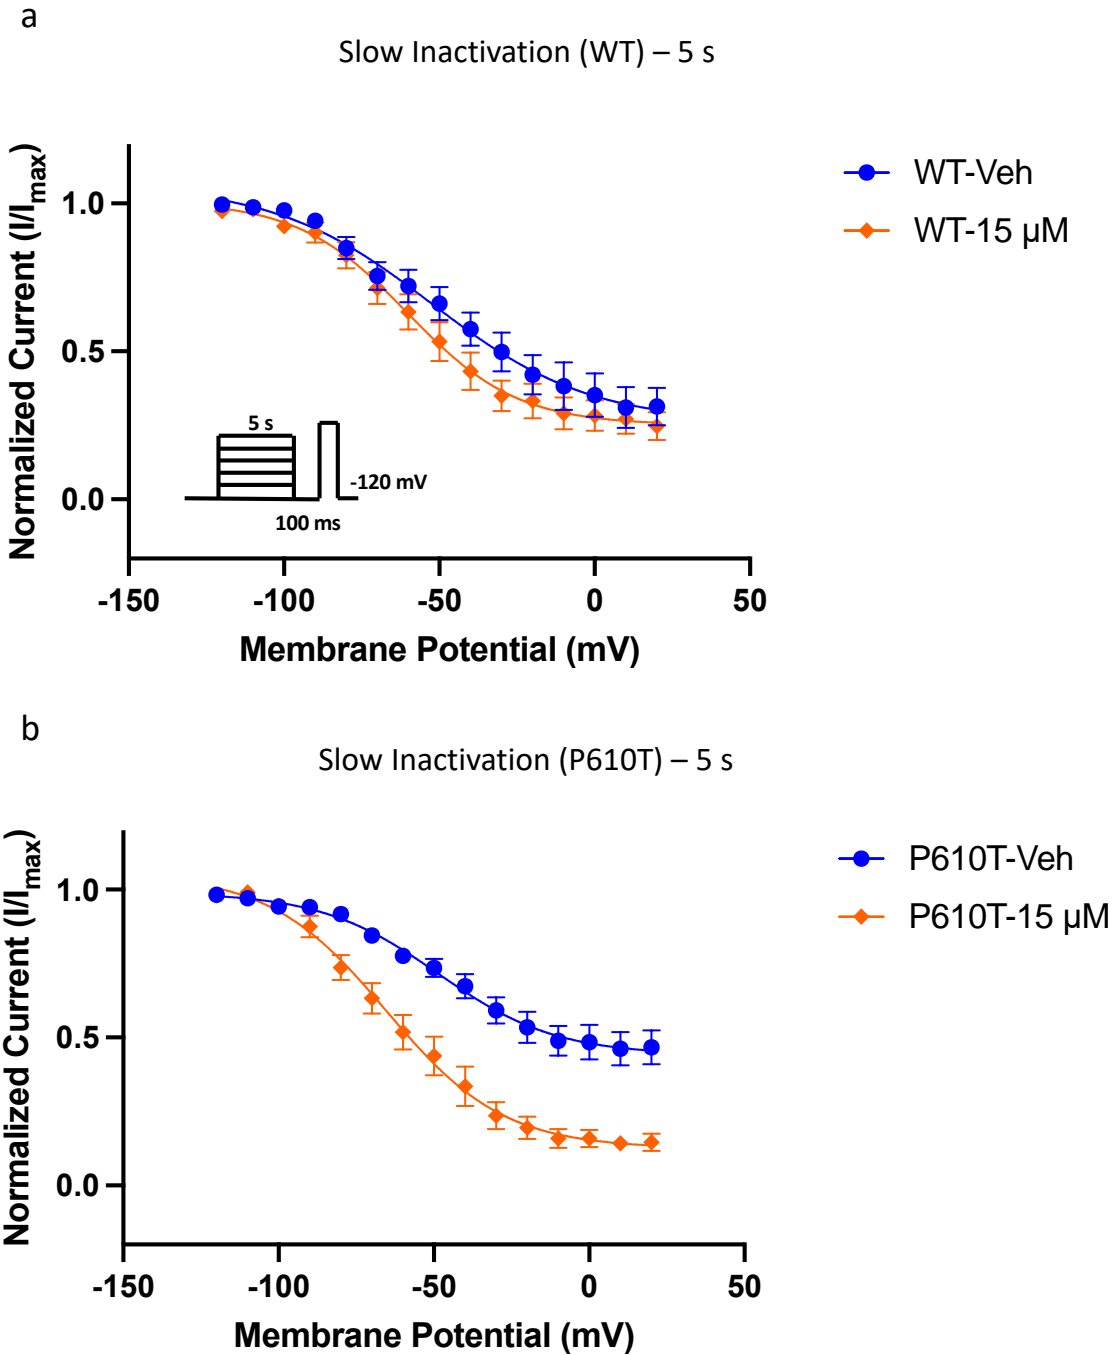

**Figure S1 – CBN hyperpolarizes slow-inactivation curve in Nav1.7-P610T.**

(a-b) Shows the curves associated with mutant and WT channels, transiently transfected into HEK cells. The time course that was used was 5 s. The concentration of CBN uses was 15  $\mu$ M. Data shown as means  $\pm$  SEM (n = 5-9).

a

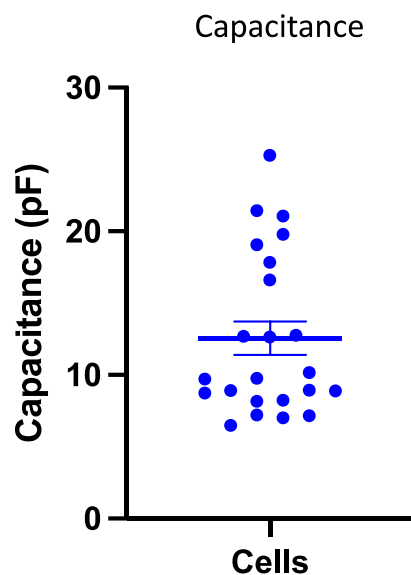

b

CBN – Inhibition of Native TTX-R Current

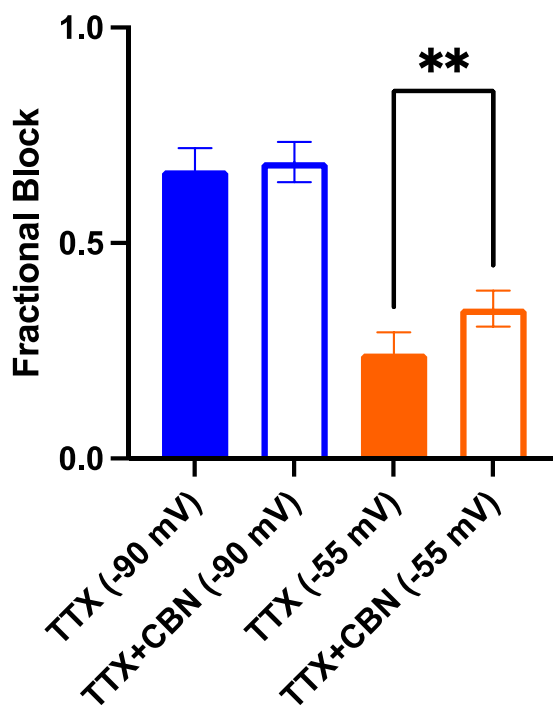

**Figure S2 – CBN inhibits TTX-R current in freshly isolated DRG neurons.**

(a) Shows the capacitance distribution of the cells that were tested at 10  $\mu$ M. (b) Shows the fractional inhibition that CBN imparted at -90 and -55 mV. Data shown as means  $\pm$  SEM (n = 21-26).
